# Supplementary material for: A polyaniline-derived iron–nitrogen–carbon nanorod network anchored on graphene as a cost-effective air-cathode electrocatalyst for microbial fuel cells
Source: Royal Society of Chemistry journal article supplement (doi:10.1039/c7qi00452d), 2017-01-01
Supplement: c7qi00452d1.pdf [file c7qi00452d1.pdf]

**Polyaniline-derived iron-nitrogen-carbon nanorods network anchored on graphene as cost-effective air-cathode electrocatalyst for microbial fuel cells**

Chun Cao <sup>ab</sup>, Liling Wei <sup>a\*</sup>, Gang Wang <sup>ab</sup>, Jianting Liu <sup>ab</sup>, Qiran Zhai <sup>c</sup> and Jianquan Shen <sup>a\*</sup>

<sup>a</sup> *Beijing National Laboratory for Molecular Sciences, Key Laboratory of Green Printing, Institute of Chemistry, Chinese Academy of Sciences, Beijing 100190, P. R. China*

<sup>b</sup> *University of Chinese Academy of Sciences, Beijing, 100049, P R China*

<sup>c</sup> *College of Chemistry and Molecular Engineering, Peking University, Beijing 100871, P. R. China*

\*Corresponding Author: E-mail: weill@iccas.ac.cn (Liling Wei); jqshen@iccas.ac.cn (Jianquan Shen)

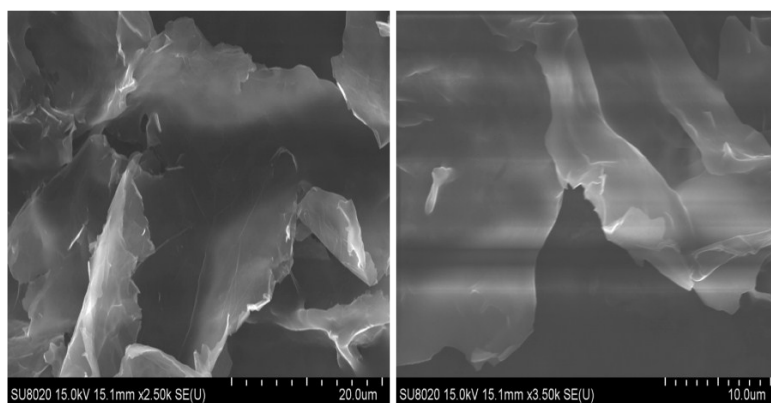

Fig. S1 SEM images of as-prepared GO.

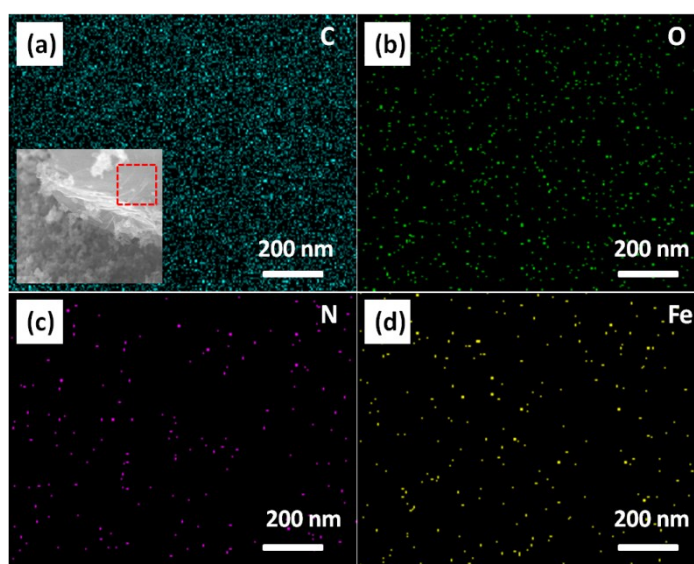

Fig. S2 SEM-EDS images of graphene: (a) carbon element signal, (b) oxygen element signal, (c) nitrogen element signal and (d) iron element signal; the insert picture in Fig. 4(a) was the corresponding SEM image.

Table S1 the element content of different catalysts from XPS results.

| Catalysts | C (at.%) | O (at.%) | Fe(at.%) | N (at.%) |       |      |            |
|-----------|----------|----------|----------|----------|-------|------|------------|
|           |          |          |          | Pd-N     | Fe-Nx | Gr-N | Oxidixed-N |
| Fe-N-C/G  | 88.91    | 6.45     | 0.52     | 0.81     | 0.43  | 2.63 | 0.25       |
